# Supplementary material for: Antimicrobial Resistance, Biocide Tolerance, and Bacterial Diversity of a Dressing Made from Coriander and Parsley after Application of Treatments Using High Hydrostatic Pressure Alone or in Combination with Moderate Heat
Source: MDPI journal article supplement (doi:10.3390/foods11172603), 2022-08-27
Supplement: s1 [file s1]

**Supplementary Table S1.** Number of reads and alpha diversity indexes at genus level of dressing samples treated or not by high-hydrostatic pressure (HP).

| Sample | No. Reads | Chao1 | Shannon | Simpson |
|--------|-----------|-------|---------|---------|
| U0     | 56912     | 101   | 2.59    | 0.82    |
| U2     | 57200     | 64    | 1.63    | 0.65    |
| U5     | 51266     | 52    | 1.69    | 0.74    |
| U10    | 56475     | 64    | 1.71    | 0.72    |
| U20    | 50928     | 25    | 0.99    | 0.45    |
| A0     | 38169     | 97    | 3.16    | 0.93    |
| A2     | 50607     | 119   | 3.02    | 0.91    |
| A5     | 62467     | 128   | 3.29    | 0.93    |
| A10    | 36648     | 123   | 3.27    | 0.93    |
| A20    | 43370     | 117   | 3.27    | 0.93    |
| B0     | 46673     | 108   | 3.05    | 0.92    |
| B2     | 47933     | 106   | 3.03    | 0.91    |
| B5     | 45995     | 113   | 3.11    | 0.92    |
| B10    | 41491     | 124   | 3.20    | 0.93    |
| B20    | 41592     | 125   | 3.33    | 0.94    |
| C0     | 47285     | 84    | 2.76    | 0.88    |
| C2     | 48422     | 106   | 2.94    | 0.88    |
| C5     | 35034     | 101   | 3.08    | 0.91    |
| C10    | 46524     | 129   | 3.30    | 0.93    |
| C20    | 47399     | 125   | 3.32    | 0.92    |
| D0     | 41706     | 98    | 2.67    | 0.87    |
| D2     | 49617     | 121   | 3.20    | 0.93    |
| D5     | 51462     | 112   | 2.98    | 0.90    |
| D10    | 41697     | 116   | 2.99    | 0.89    |
| D20    | 48628     | 122   | 3.24    | 0.91    |

The U samples correspond to the untreated controls. The different APH treatments are: A, 450 MPa at 22 °C; B, 450 MPa at 50 °C; C, 600 MPa at 22 °C; and D, 600 MPa at 50 °C. The numbers indicate the storage time (days). Chao 1 is an abundance-based estimator of species richness. The Shannon and Simpson indices are estimators of both species richness and evenness, with more emphasis on richness (Shannon) or evenness (Simpson).
